# Supplementary material for: Dimeric complexes of rare-earth substituted Keggin-type silicotungstates: syntheses, crystal structure and solid state properties
Source: Royal Society of Chemistry journal article supplement (doi:10.1039/c4ra02751e), 2014-01-01
Supplement: c4ra02751e1.pdf [file c4ra02751e1.pdf]

## Supporting information

### **Dimeric complexes of rare-earth substituted Keggin-type silicotungstates: Syntheses, crystal structure and solid state properties**

Mukesh Kumar Saini,<sup>a</sup> Rakesh Gupta,<sup>a</sup> Swati Parbhakar,<sup>a</sup> Anil Kumar Mishra,<sup>b</sup> Rashi Mathur,<sup>b</sup> and Firasat Hussain<sup>\*a</sup>

#### **Table of Contents-**

**Fig. S1** FT-IR spectra of  $\text{Na}_4\text{K}_8[\{\text{Ln}(\alpha\text{-SiW}_{11}\text{O}_{39})(\text{H}_2\text{O})\}_2(\mu\text{-CH}_3\text{COO})_2] \cdot x\text{H}_2\text{O}$  [Ln = Eu<sup>III</sup> (**Eu-1a**), Gd<sup>III</sup> (**Gd-2a**), Tb<sup>III</sup> (**Tb-3a**), Dy<sup>III</sup> (**Dy-4a**), Ho<sup>III</sup> (**Ho-5a**), Er<sup>III</sup> (**Er-6a**), and Tm<sup>III</sup> (**Tm-7a**)] (recorded on KBr pellets).

**Fig. S2** FT-IR spectra of  $\text{Na}_4\text{K}_8[\{\text{Tm}(\alpha\text{-SiW}_{11}\text{O}_{39})(\text{H}_2\text{O})\}_2(\mu\text{-CH}_3\text{COO})_2] \cdot 26\text{H}_2\text{O}$  (**Tm-7a**) POM,  $\text{Na}_{10}[\alpha\text{-SiW}_9\text{O}_{34}] \cdot 16\text{H}_2\text{O}$  and  $\text{K}_8[\alpha\text{-SiW}_{11}\text{O}_{39}] \cdot 13\text{H}_2\text{O}$  (recorded on KBr pellets).

**Fig. S3** FT-IR spectra of  $\text{K}_6\text{Na}_7[\text{Ln}(\text{SiW}_{11}\text{O}_{39})_2] \cdot x\text{H}_2\text{O}$  [Ln = Pr<sup>III</sup> (**Pr-8a**), Nd<sup>III</sup> (**Nd-9a**), and Sm<sup>III</sup> (**Sm-10a**)] POMs (recorded on KBr pellets).

**Fig. S4** Solid state UV/vis spectrum of  $\text{Na}_4\text{K}_8[\{\text{Dy}(\alpha\text{-SiW}_{11}\text{O}_{39})(\text{H}_2\text{O})\}_2(\mu\text{-CH}_3\text{COO})_2] \cdot 30\text{H}_2\text{O}$  (**Dy-4a**).

**Fig. S5** Photoluminescence spectrum of  $\text{Na}_4\text{K}_8[\{\text{Tb}(\alpha\text{-SiW}_{11}\text{O}_{39})(\text{H}_2\text{O})\}_2(\mu\text{-CH}_3\text{COO})_2] \cdot 22\text{H}_2\text{O}$  (**Tb-3a**).

**Fig. S6** Thermogravimetric analysis data of  $\text{Na}_4\text{K}_8[\{\text{Ln}(\alpha\text{-SiW}_{11}\text{O}_{39})(\text{H}_2\text{O})\}_2(\mu\text{-CH}_3\text{COO})_2] \cdot x\text{H}_2\text{O}$  [Ln = Eu<sup>III</sup> (**Eu-1a**), Gd<sup>III</sup> (**Gd-2a**), Tb<sup>III</sup> (**Tb-3a**), Dy<sup>III</sup> (**Dy-4a**), Ho<sup>III</sup> (**Ho-5a**), Er<sup>III</sup> (**Er-6a**), and Tm<sup>III</sup> (**Tm-7a**)].

**Fig. S7** Thermogravimetric analysis data of  $\text{K}_6\text{Na}_7[\text{Ln}(\text{SiW}_{11}\text{O}_{39})_2] \cdot x\text{H}_2\text{O}$  [Ln = Pr<sup>III</sup> (**Pr-8a**), Nd<sup>III</sup> (**Nd-9a**), and Sm<sup>III</sup> (**Sm-10a**)].

**Fig. S8** UV/vis spectra of  $\text{Na}_4\text{K}_8[\{\text{Ln}(\alpha\text{-SiW}_{11}\text{O}_{39})(\text{H}_2\text{O})\}_2(\mu\text{-CH}_3\text{COO})_2] \cdot x\text{H}_2\text{O}$  [Ln = Eu<sup>III</sup> (**Eu-1a**), Gd<sup>III</sup> (**Gd-2a**), Tb<sup>III</sup> (**Tb-3a**), Dy<sup>III</sup> (**Dy-4a**), Ho<sup>III</sup> (**Ho-5a**), Er<sup>III</sup> (**Er-6a**), and Tm<sup>III</sup> (**Tm-7a**)].

**Fig. S9** <sup>1</sup>H NMR data of **Eu-1a**, **Gd-2a**, **Tb-3a**, **Dy-4a**, **Eu-5a**, **Er-6a** and **Tm-7a** POMs.

**Fig. S10** <sup>13</sup>C NMR data of **Eu-1a**, **Gd-2a**, **Tb-3a**, **Dy-4a**, **Eu-5a**, **Er-6a** and **Tm-7a** POMs.

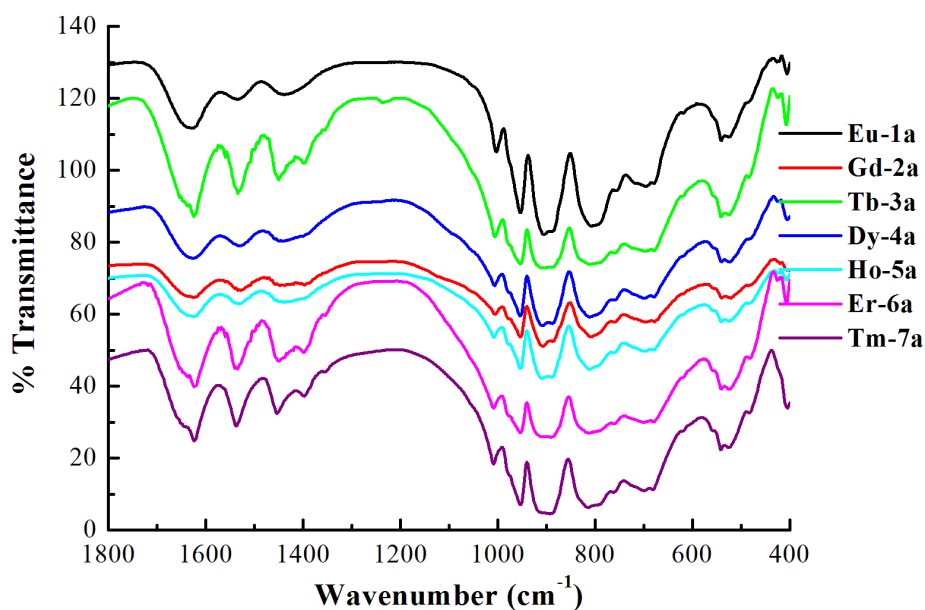

**Fig. S1** FT-IR spectra of  $\text{Na}_4\text{K}_8\{[\text{Ln}(\alpha\text{-SiW}_{11}\text{O}_{39})(\text{H}_2\text{O})_2](\mu\text{-CH}_3\text{COO})_2\} \cdot x\text{H}_2\text{O}$  [Ln = Eu<sup>III</sup> (**Eu-1a**), Gd<sup>III</sup> (**Gd-2a**), Tb<sup>III</sup> (**Tb-3a**), Dy<sup>III</sup> (**Dy-4a**), Ho<sup>III</sup> (**Ho-5a**), Er<sup>III</sup> (**Er-6a**), and Tm<sup>III</sup> (**Tm-7a**)] (recorded on KBr pellets).

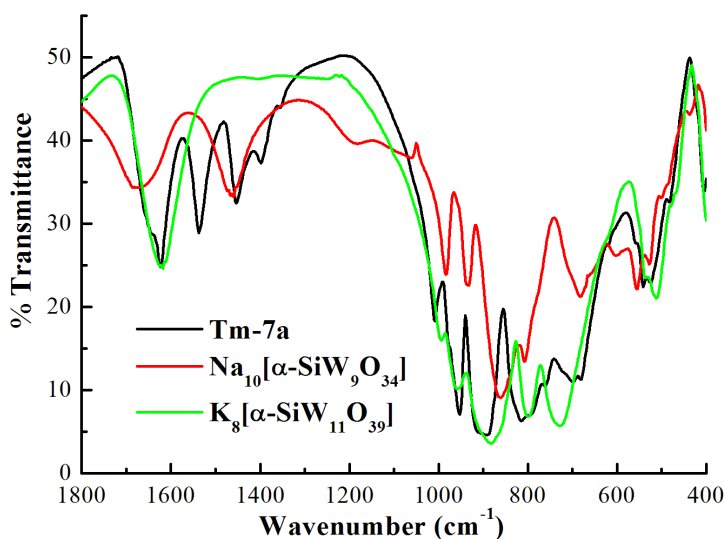

**Fig. S2** FT-IR spectra of **Tm-7a** POM,  $\text{Na}_{10}[\alpha\text{-SiW}_9\text{O}_{34}] \cdot 16\text{H}_2\text{O}$  and  $\text{K}_8[\alpha\text{-SiW}_{11}\text{O}_{39}] \cdot 13\text{H}_2\text{O}$  (recorded on KBr pellets)

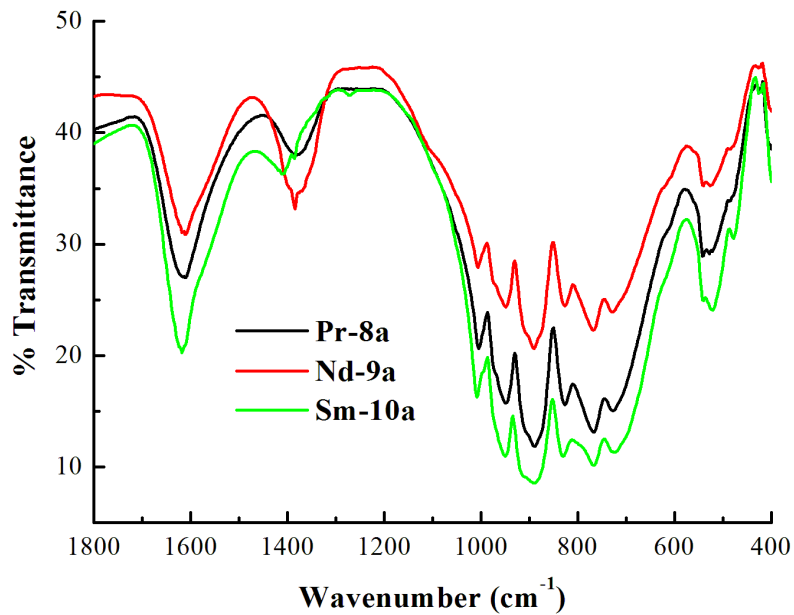

**Fig. S3** FT-IR spectra of  $\text{K}_6\text{Na}_7[\text{Ln}(\text{SiW}_{11}\text{O}_{39})_2] \cdot x\text{H}_2\text{O}$  [ $\text{Ln} = \text{Pr}^{\text{III}}$  (**Pr-8a**),  $\text{Nd}^{\text{III}}$  (**Nd-9a**), and  $\text{Sm}^{\text{III}}$  (**Sm-10a**)] POMs (recorded on KBr pellets).

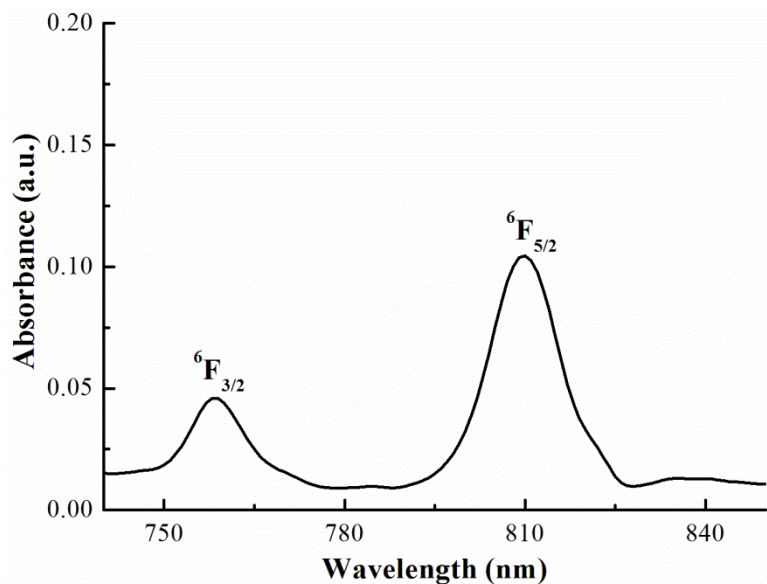

**Fig. S4** Solid state UV/vis spectrum of  $\text{Na}_4\text{K}_8[\{\text{Dy}(\alpha\text{-SiW}_{11}\text{O}_{39})(\text{H}_2\text{O})\}_2(\mu\text{-CH}_3\text{COO})_2] \cdot 30\text{H}_2\text{O}$  (**Dy-4a**).

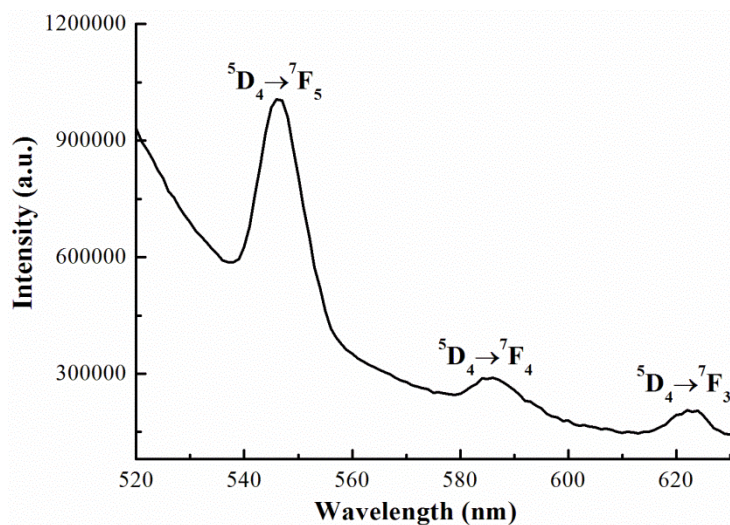

**Fig. S5** Photoluminescence spectrum of  $\text{Na}_4\text{K}_8\{[\text{Tb}(\alpha\text{-SiW}_{11}\text{O}_{39})(\text{H}_2\text{O})]_2(\mu\text{-CH}_3\text{COO})_2\} \cdot 22\text{H}_2\text{O}$  (**Tb-3a**).

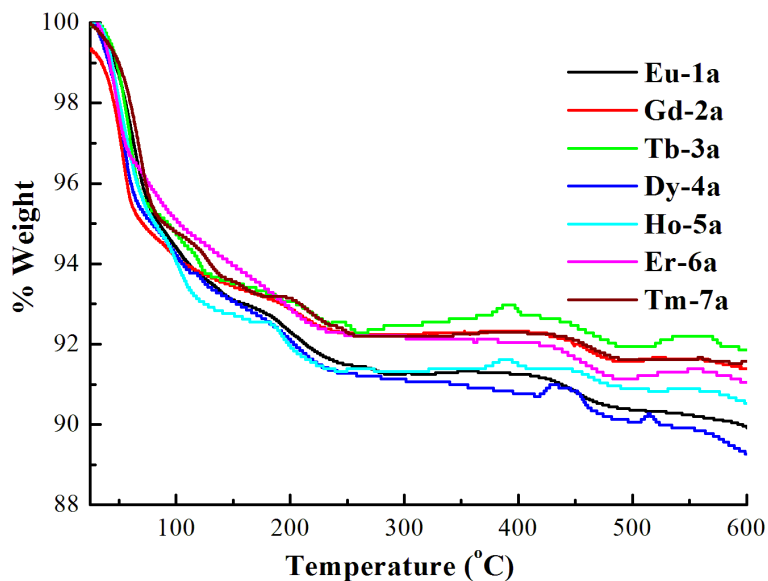

**Fig. S6** Thermogravimetric analysis data of  $\text{Na}_4\text{K}_8\{[\text{Ln}(\alpha\text{-SiW}_{11}\text{O}_{39})(\text{H}_2\text{O})]_2(\mu\text{-CH}_3\text{COO})_2\} \cdot x\text{H}_2\text{O}$  [ $\text{Ln} = \text{Eu}^{\text{III}}$  (**Eu-1a**),  $\text{Gd}^{\text{III}}$  (**Gd-2a**),  $\text{Tb}^{\text{III}}$  (**Tb-3a**),  $\text{Dy}^{\text{III}}$  (**Dy-4a**),  $\text{Ho}^{\text{III}}$  (**Ho-5a**),  $\text{Er}^{\text{III}}$  (**Er-6a**), and  $\text{Tm}^{\text{III}}$  (**Tm-7a**)].

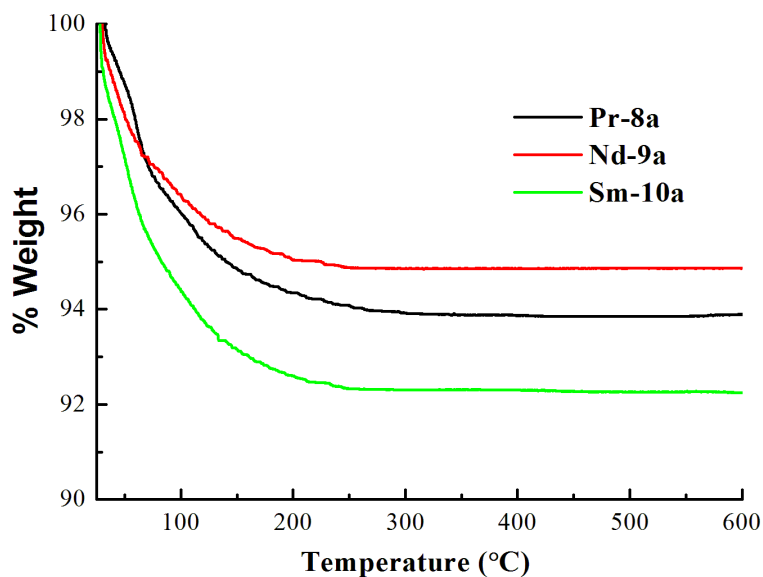

**Fig. S7** Thermogravimetric analysis data of  $\text{K}_6\text{Na}_7[\text{Ln}(\text{SiW}_{11}\text{O}_{39})_2] \cdot x\text{H}_2\text{O}$  [ $\text{Ln} = \text{Pr}^{\text{III}}$  (**Pr-8a**),  $\text{Nd}^{\text{III}}$  (**Nd-9a**), and  $\text{Sm}^{\text{III}}$  (**Sm-10a**)].

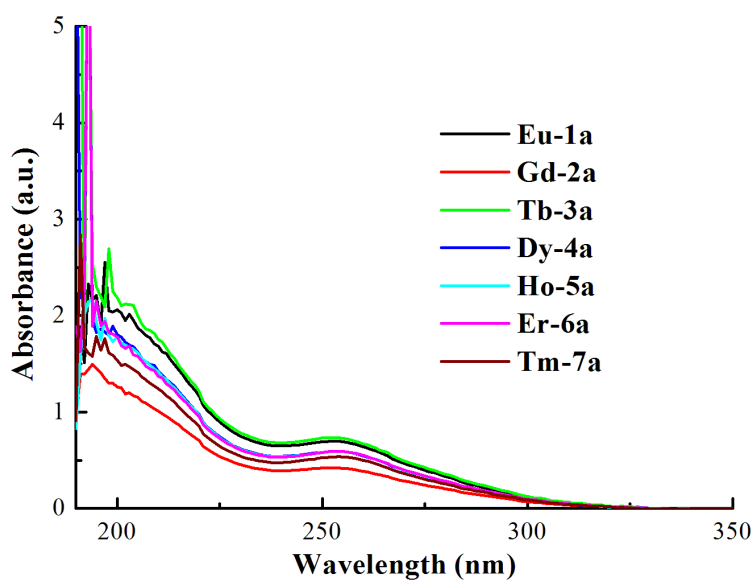

**Fig. S8** UV/vis spectra of  $\text{Na}_4\text{K}_8[\{\text{Ln}(\alpha\text{-SiW}_{11}\text{O}_{39})(\text{H}_2\text{O})\}_2(\mu\text{-CH}_3\text{COO})_2] \cdot x\text{H}_2\text{O}$  [ $\text{Ln} = \text{Eu}^{\text{III}}$  (**Eu-1a**),  $\text{Gd}^{\text{III}}$  (**Gd-2a**),  $\text{Tb}^{\text{III}}$  (**Tb-3a**),  $\text{Dy}^{\text{III}}$  (**Dy-4a**),  $\text{Ho}^{\text{III}}$  (**Ho-5a**),  $\text{Er}^{\text{III}}$  (**Er-6a**), and  $\text{Tm}^{\text{III}}$  (**Tm-7a**)].

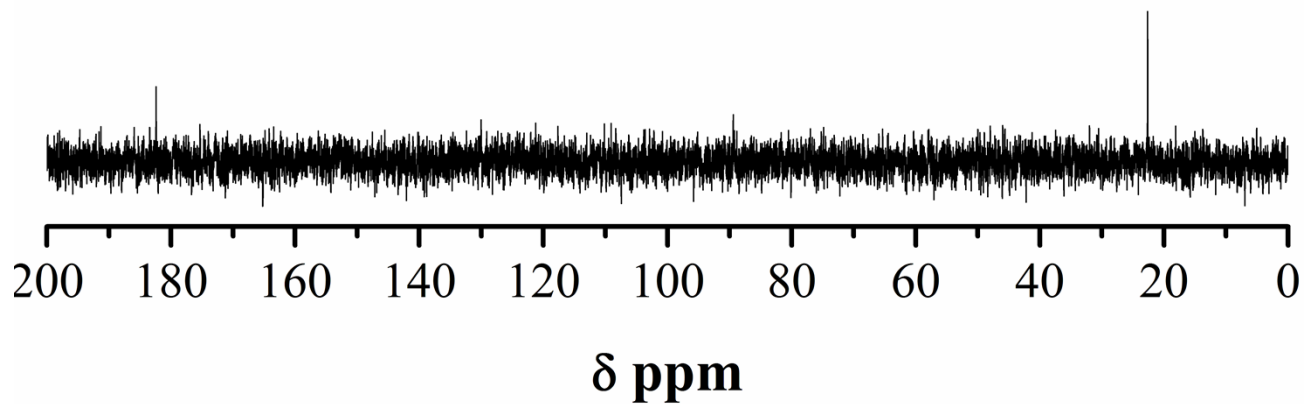

**Fig. S9**  $^{13}\text{C}$  NMR data of **Eu-1a**, POMs

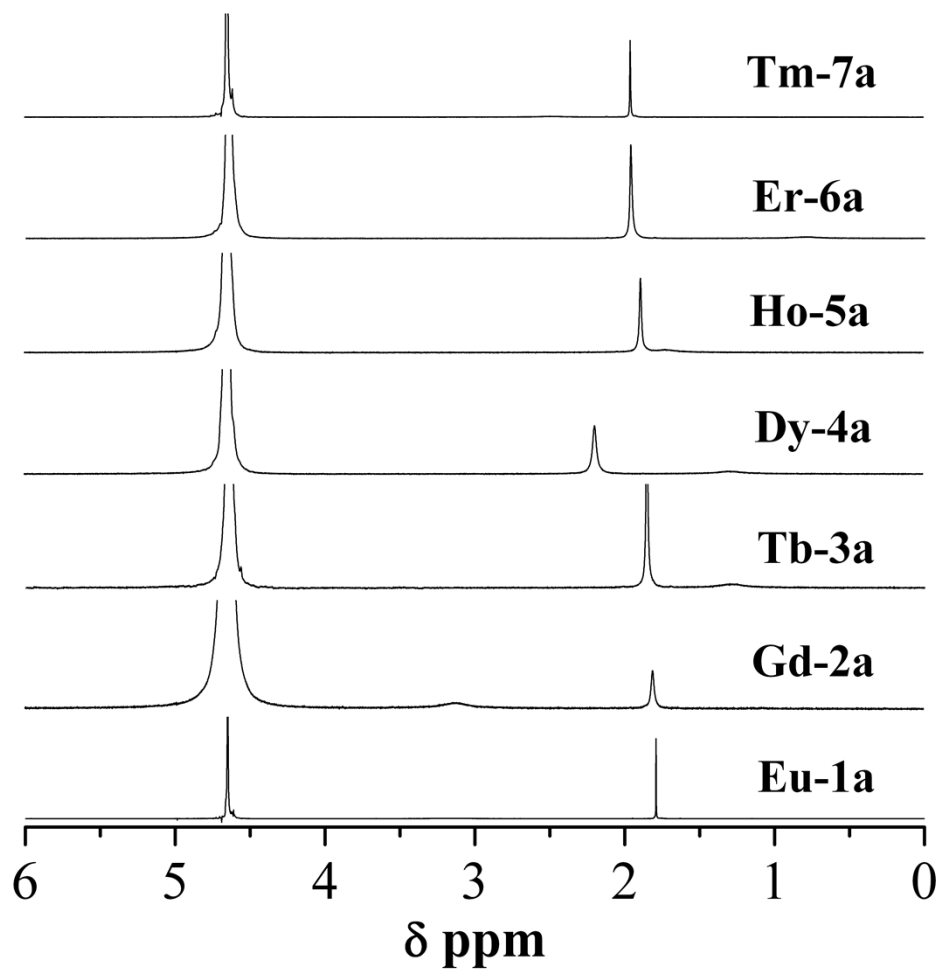

**Fig. S10**  $^1\text{H}$  NMR data of **Eu-1a**, **Gd-2a**, **Tb-3a**, **Dy-4a**, **Eu-5a**, **Er-6a** and **Tm-7a** POM
